# Supplementary material for: RAIBO2: Highly efficient quadruped robot completing full marathon with a single battery charge
Source: Research Square preprint supplement (doi:10.21203/rs.3.rs-6040970/v1), 2025-03-26
Supplement: Supplementary file 1 [file SIguide.doc]

**Supplementary Information Guide**

**Supplementary Video 1**: Versatile Locomotion Capabilities of RAIBO2 in Various Outdoor Environments

A quadrupedal robot RAIBO2 demonstrates robust locomotion across diverse real-world scenarios. The video shows the robot maintaining stable gait patterns while running alongside human marathoners, ascending stairs, executing high-speed locomotion on flat terrain, and navigating through snowy conditions, highlighting its adaptability to challenging environmental conditions.

**Supplementary Video 2**: Comparative Analysis of Collision Reward Impact on RAIBO2 Running Efficiency

Experimental comparison of RAIBO2's running performance with and without collision reward in the control policy at controlled speed (4 m/s) on a treadmill. Real-time waveform visualization demonstrates total loss, electric loss, and mechanical loss metrics. The video clearly illustrates significantly higher mechanical losses in the control policy without collision reward, validating the effectiveness of the collision reward term.

**Supplementary Video 3**: Quantitative Analysis of Body Height Effects on RAIBO2 Running Efficiency

Systematic comparison of RAIBO2's running performance at three different body heights (0.45m, 0.50m, 0.55m) at controlled speed (4 m/s) on a treadmill. Real-time waveform visualization shows total loss, electric loss, and mechanical loss metrics. The video demonstrates the inverse relationship between body height and electric loss, with higher configurations resulting in reduced electric losses during locomotion.

**Supplementary Video 4**: RAIBO2 Marathon Achievement Documentation

Complete documentation of RAIBO2's marathon performance including course overview and running highlights. The video presents key segments of the 42.195 km marathon course and showcases sustained stable locomotion throughout the event, demonstrating the robot's endurance and reliability.
